# Supplementary material
Source: ML conference proceedings conference paper supplement (https://openreview.net/forum?id=znGnmAM44K)
Supplement: supplementary_material [file attachment]

12:29

700. "AI can never be truly intelligent." What do you think about this statement?

I completely disagree. Why would intelligence be an exclusive property of humans or other animals?

A ☐

Not A ☐

→

Survey Completion

0% 100%

Powered by Qualtrics

(a)

525. What's the most rewarding part of your job?

- ☐ The most rewarding part of my job is mentoring brilliant students and postdocs, seeing their growth, and witnessing their contributions to advancing our understanding of the brain.
- ☐ The social relationship with other teachers
- ☐ The most rewarding part of my job is when a student that I have mentored gets a paper published, gets a grant, gets a fellowship, gets a job. That is extremely rewarding.
- ☐ Seeing students thrive.
- ☐ Discovering new neural mechanisms and seeing how they impact human behavior and cognition, it's a thrill every time!

Survey Completion

0% 100%

(b)
